# Supplementary material
Source: MDPI journal article supplement (https://www.mdpi.com/2304-6732/10/8/881)

## Hyperspectral Mapping Steps in the Dental Office Area with Topological Reference: Chemical and HCA Imaging.

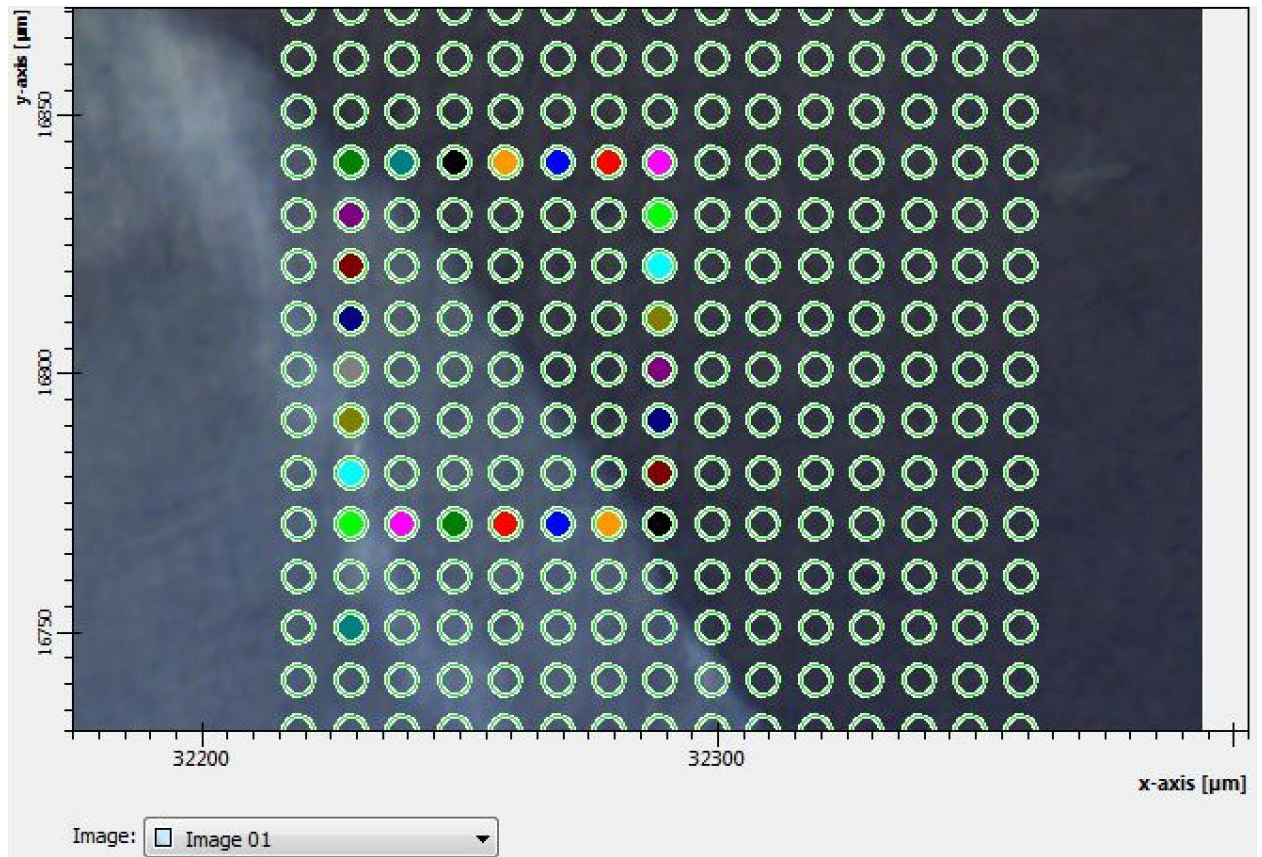

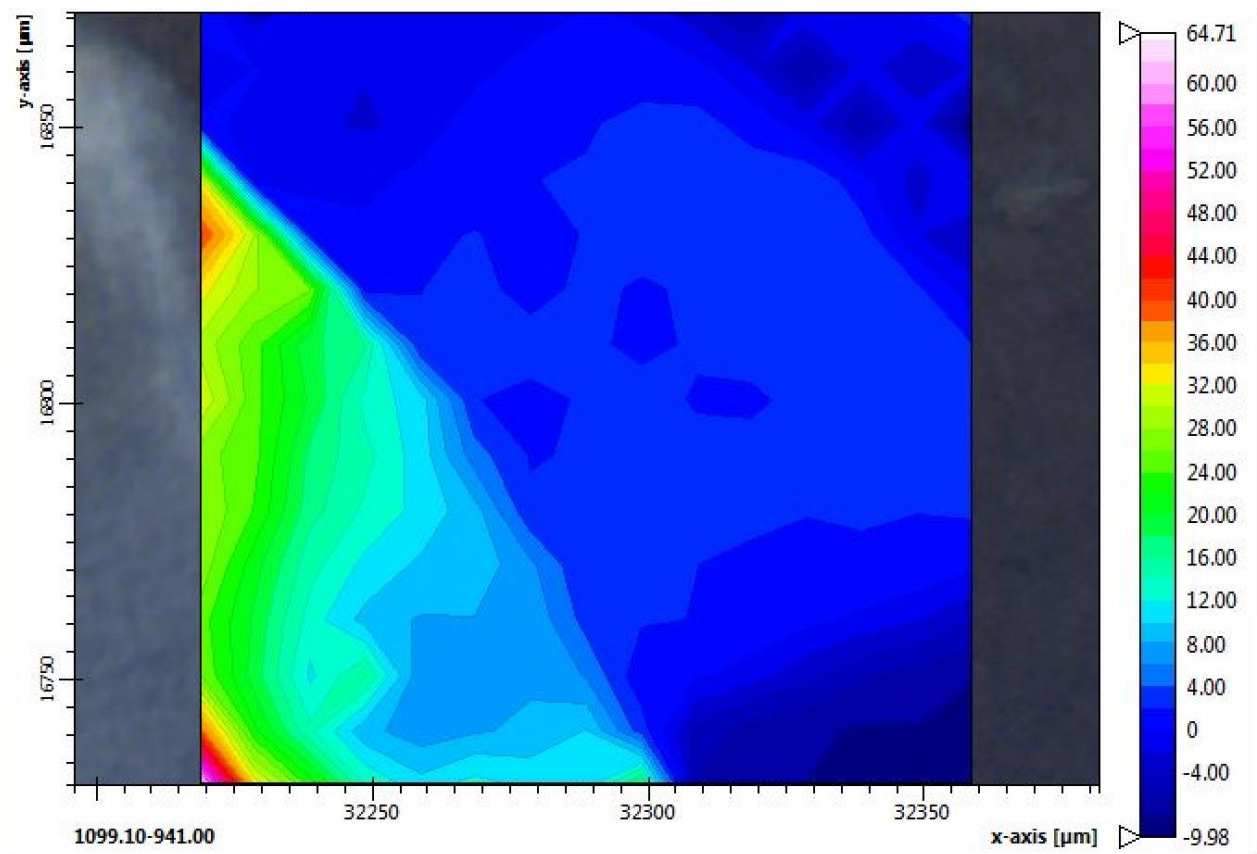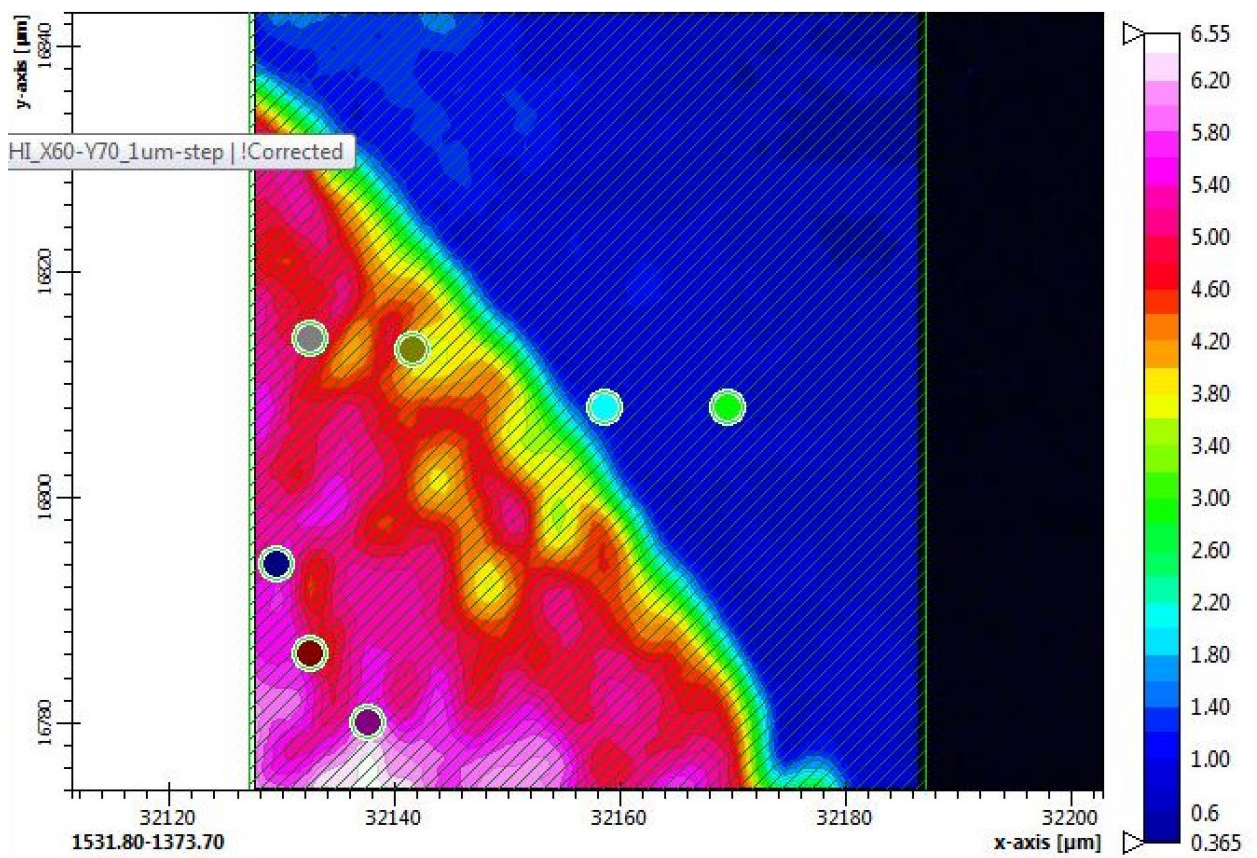



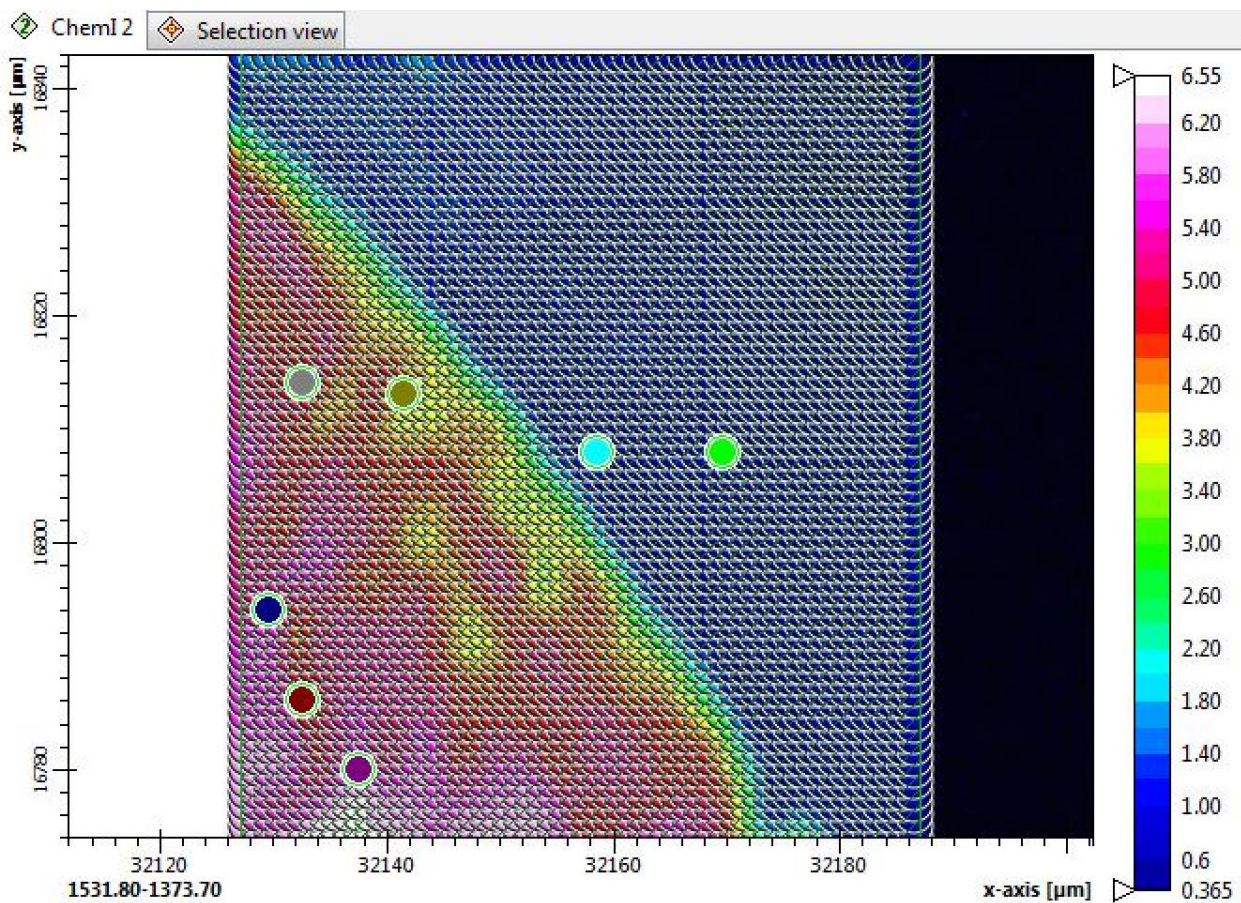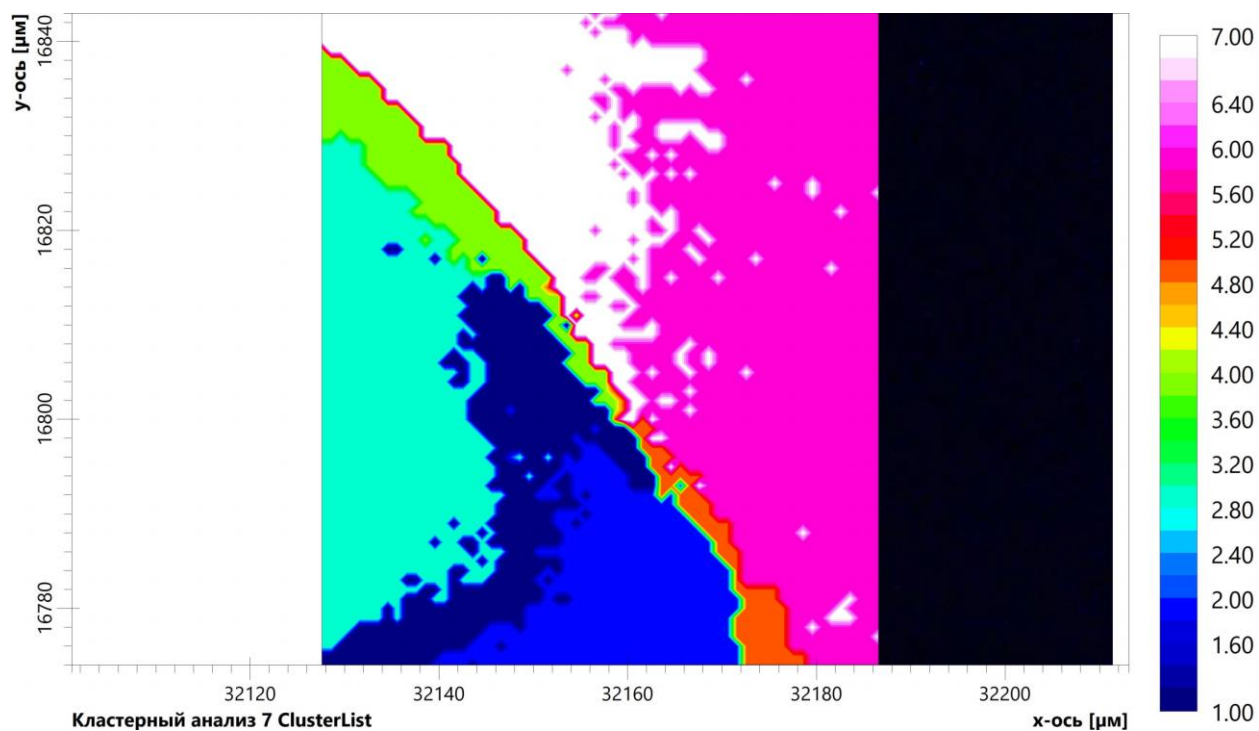

**HCA images in the area of dental composite/dental tissue interfaces  
with cavity wall formation in the sample by an Er:YAG pulsed laser**

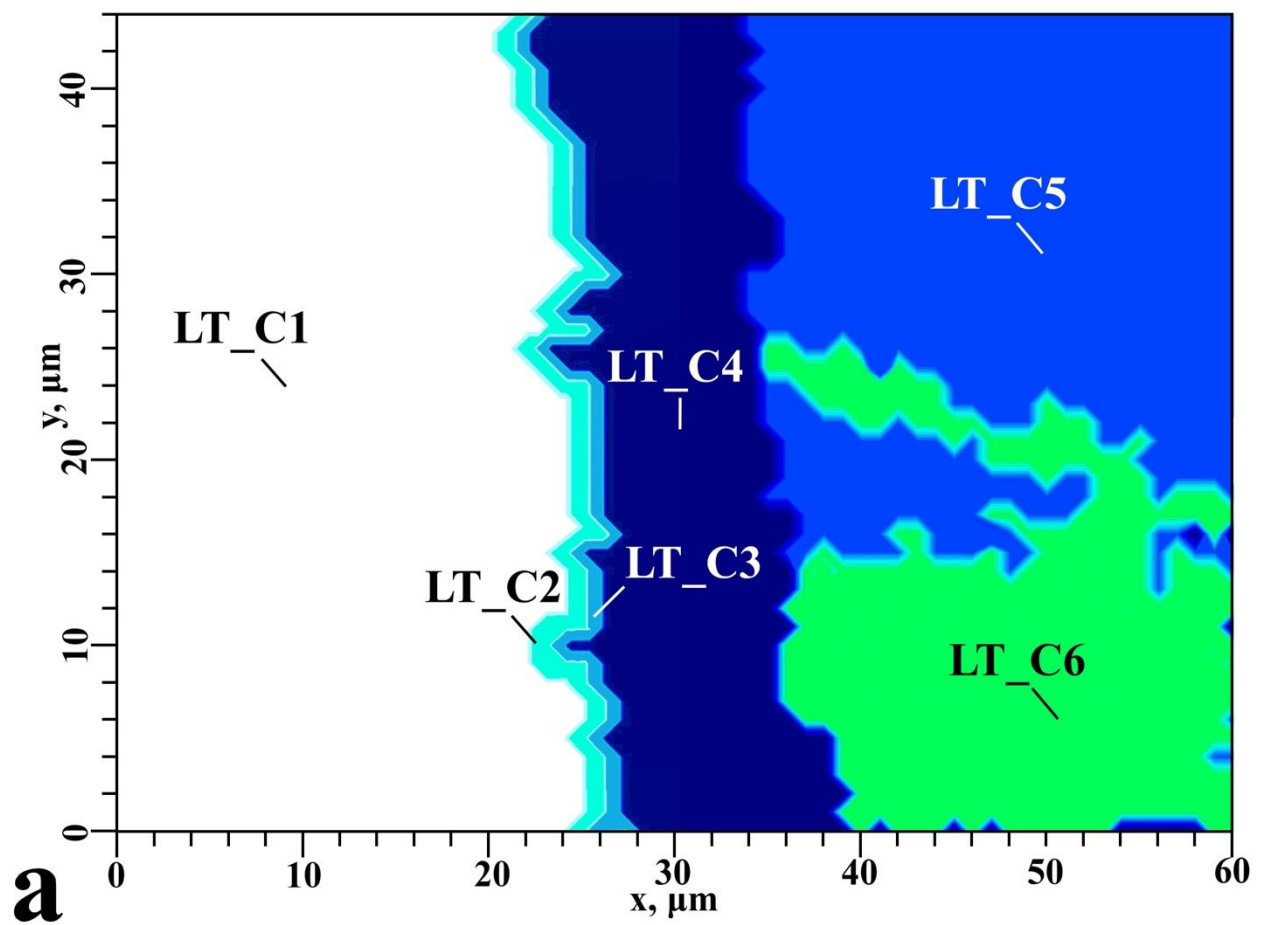

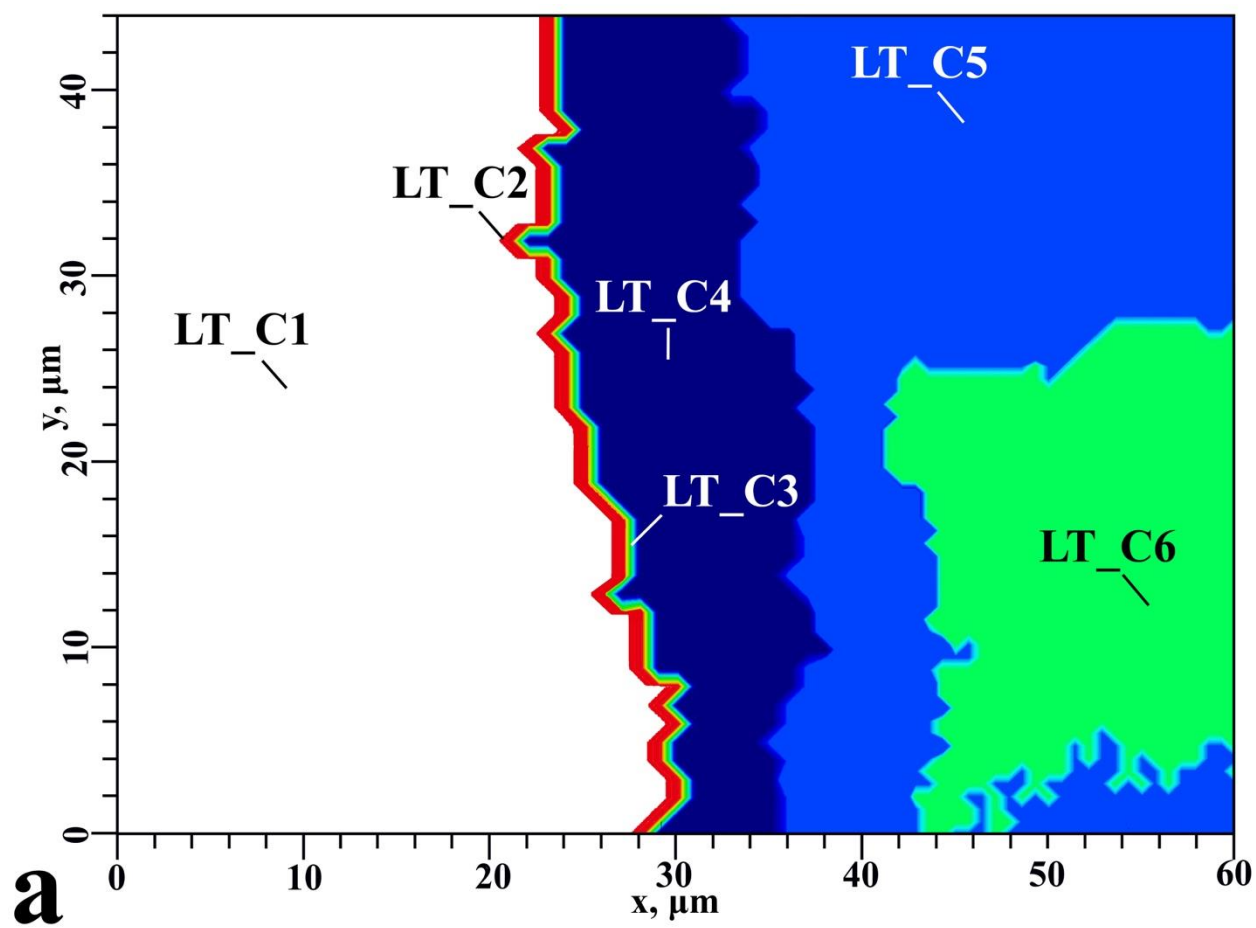

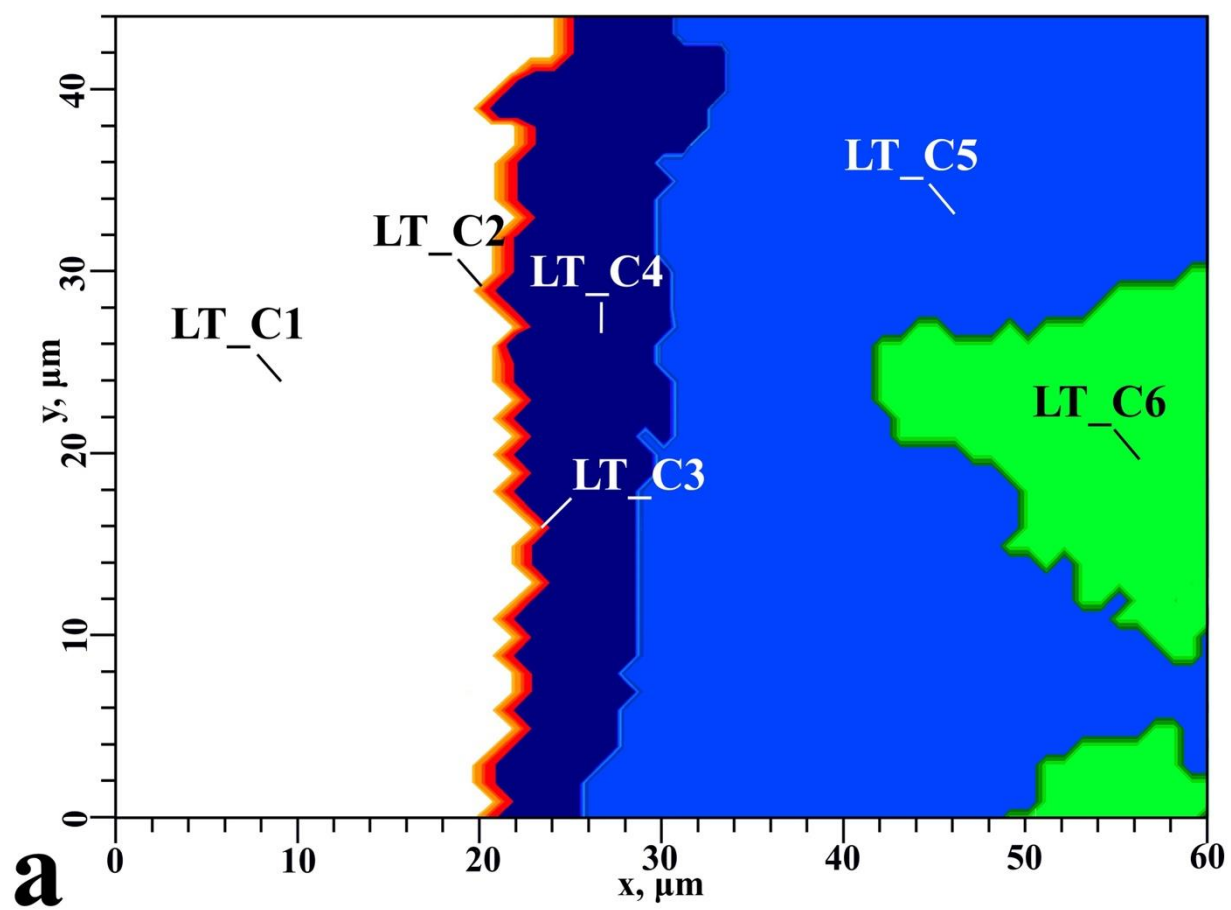

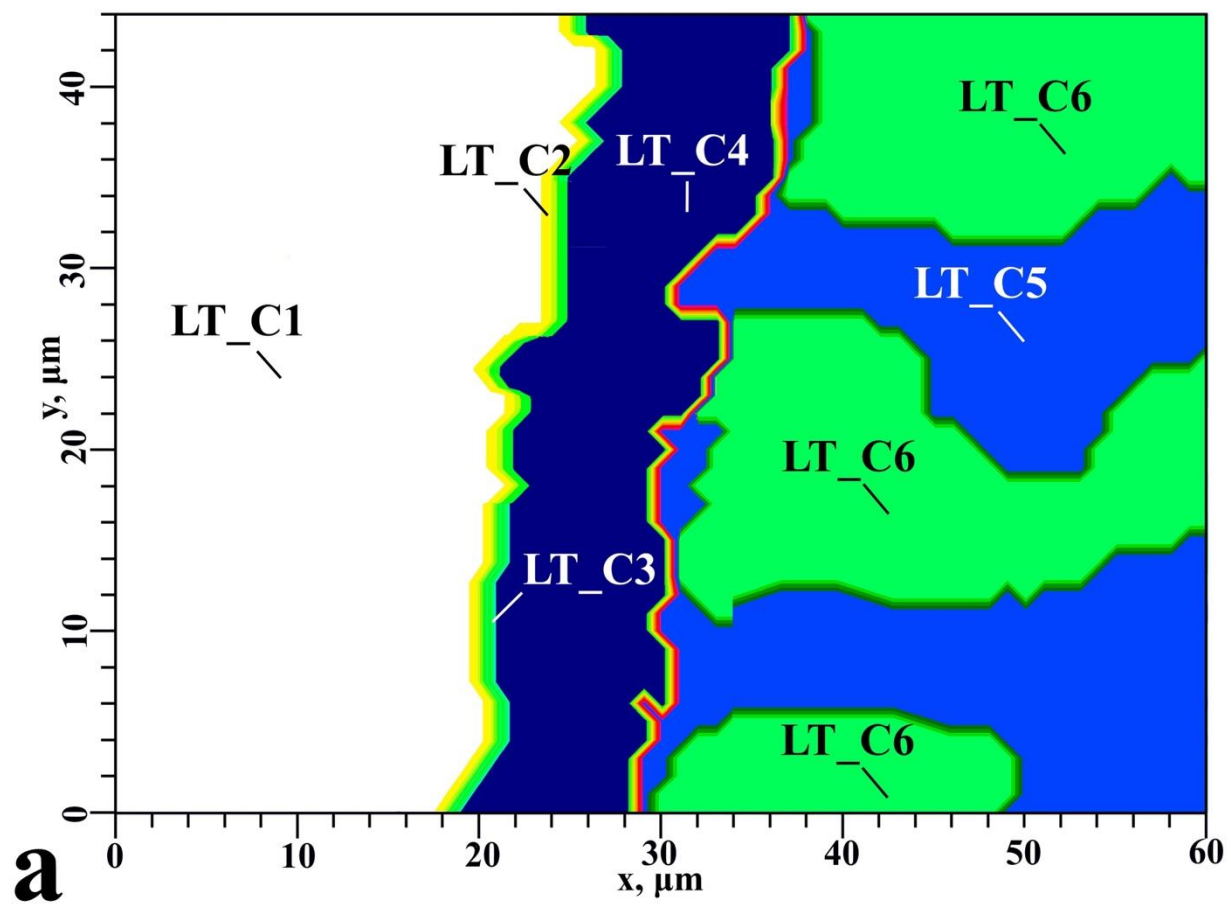

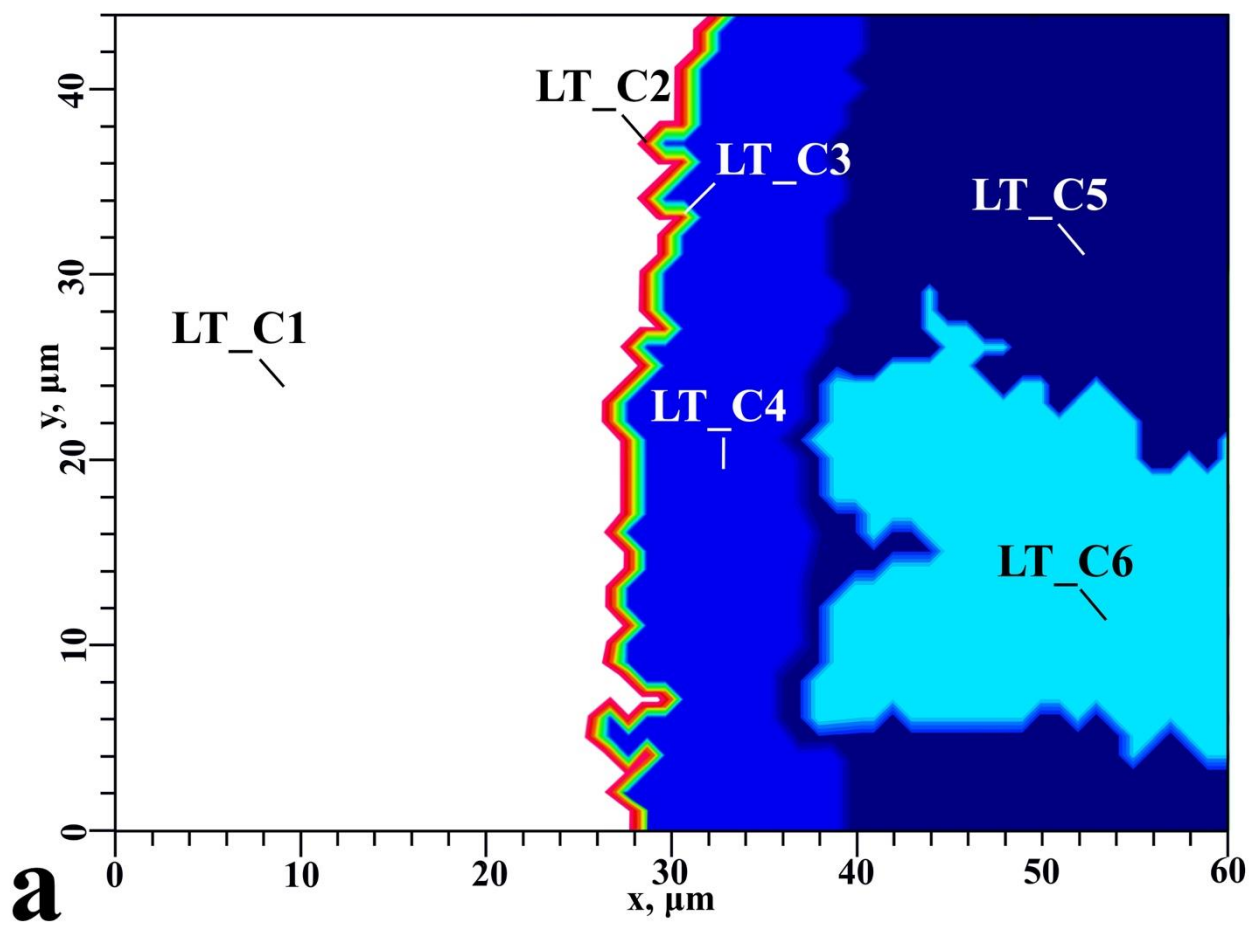



**HCA images in the area of dental composite/dental tissue interfaces with cavity wall formation in the sample by diamond cylindrical drill with a turbine handpiece.**

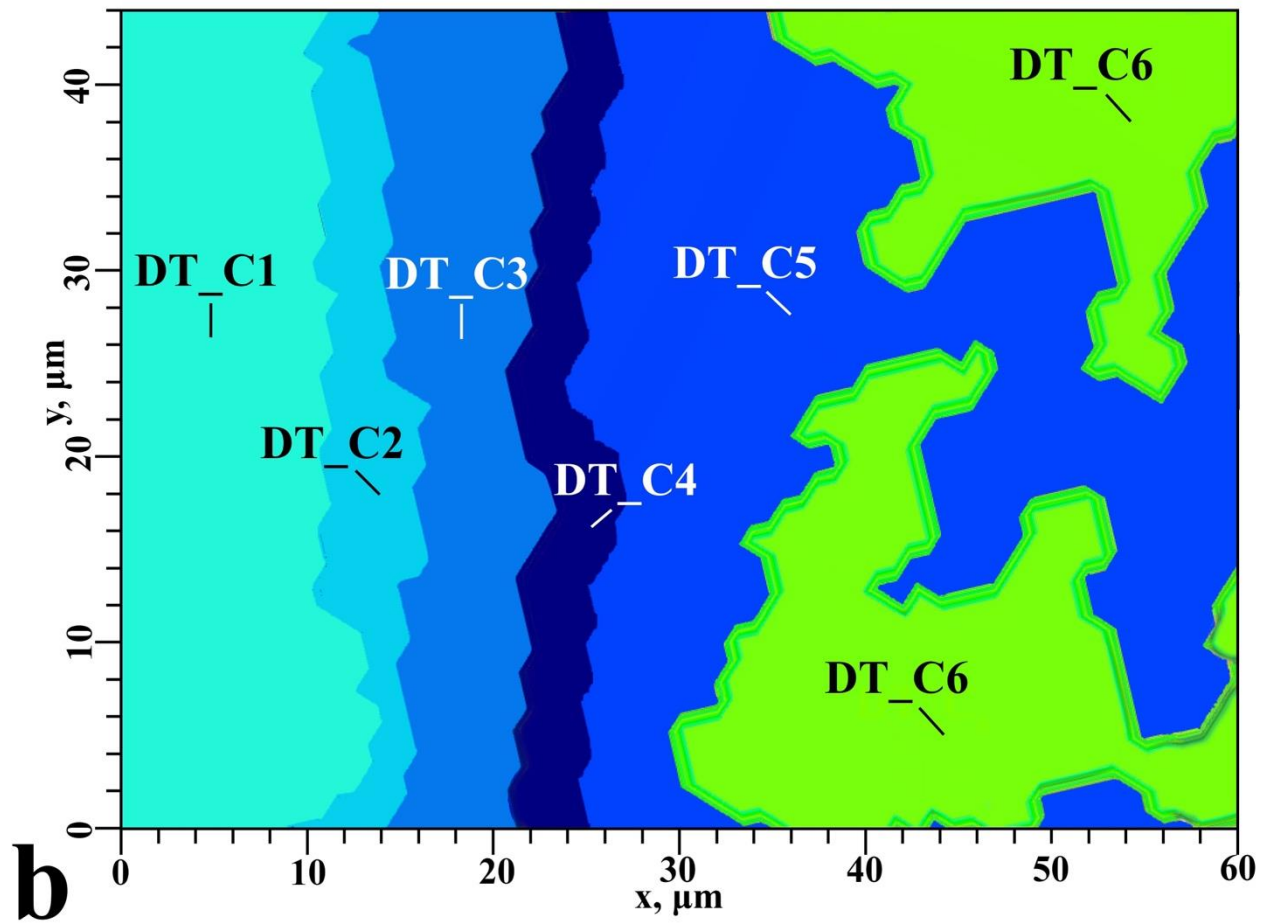

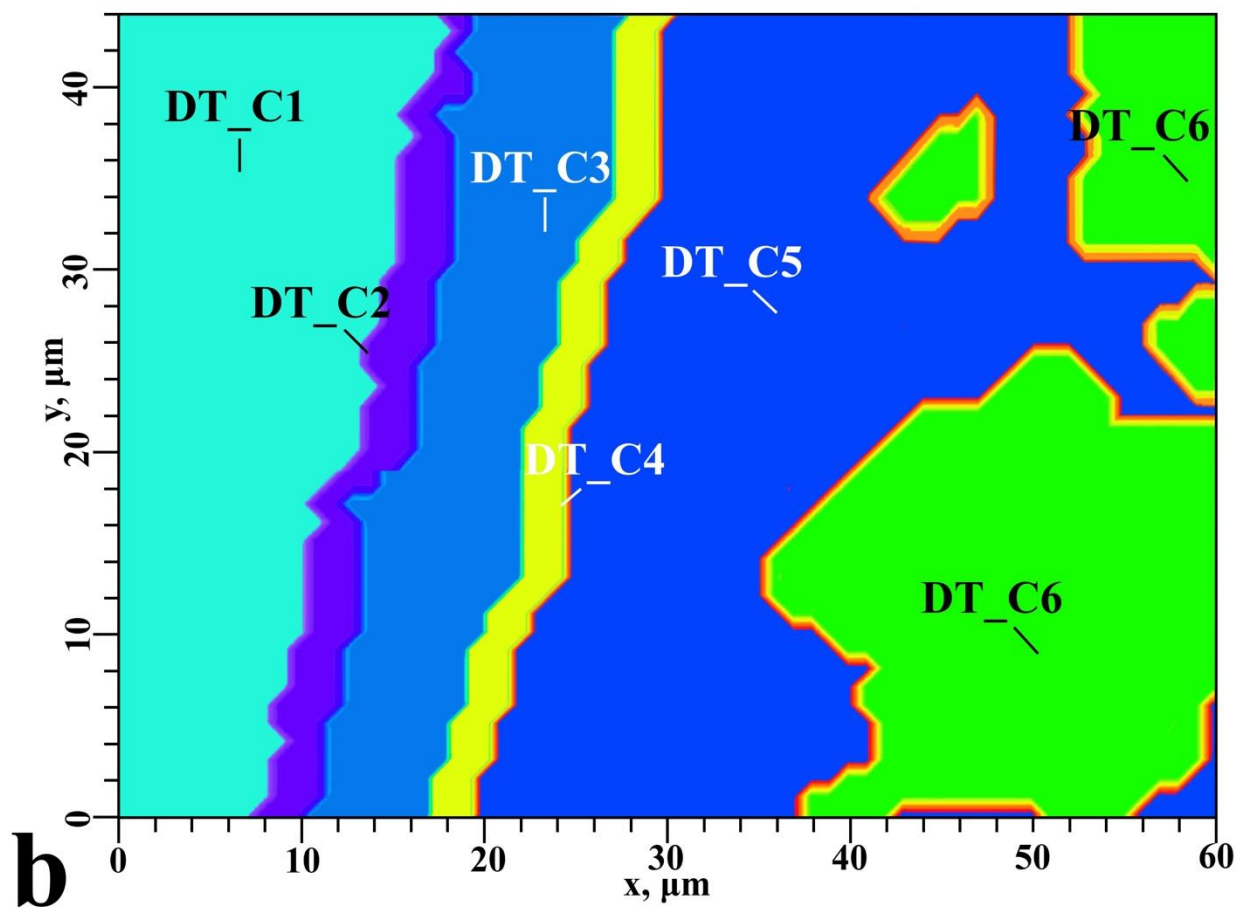

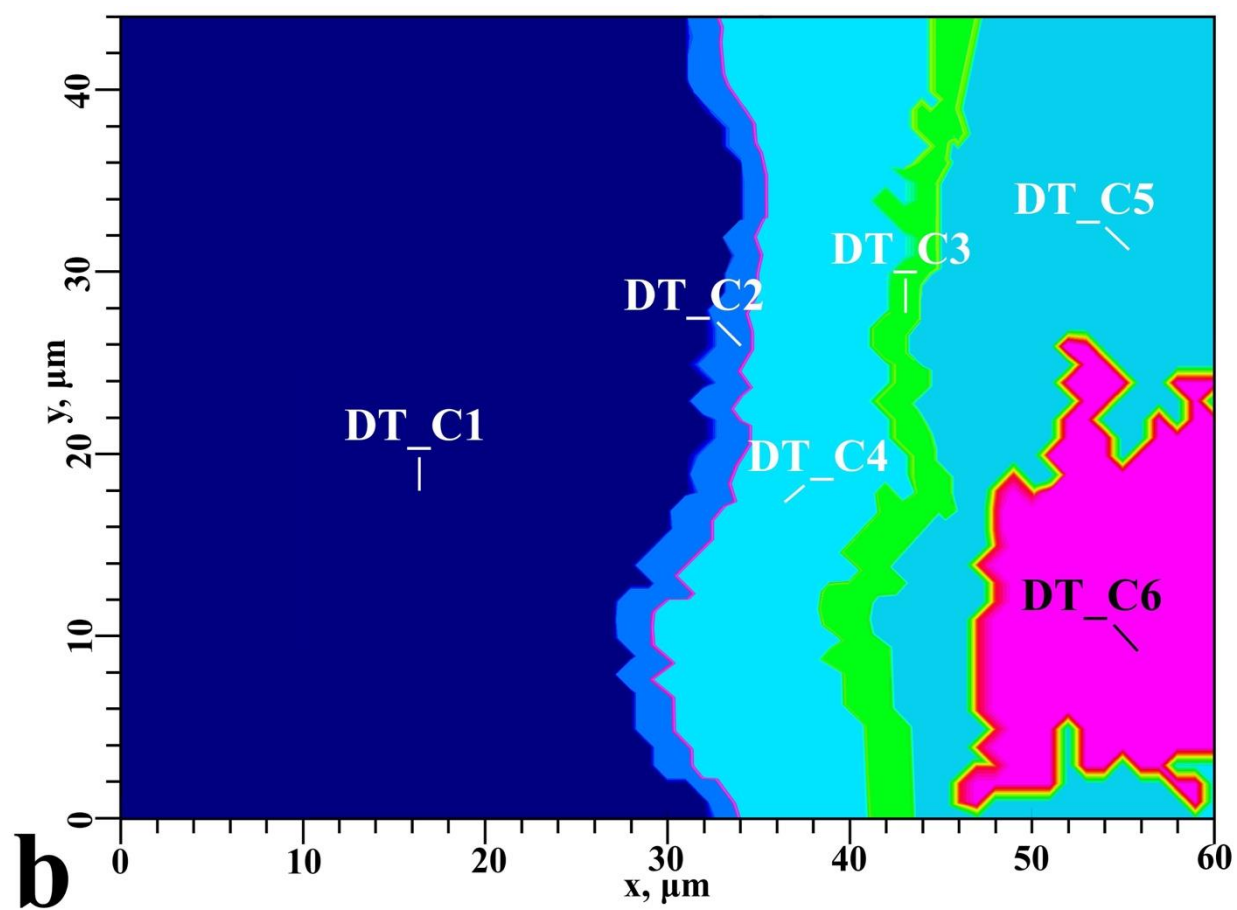

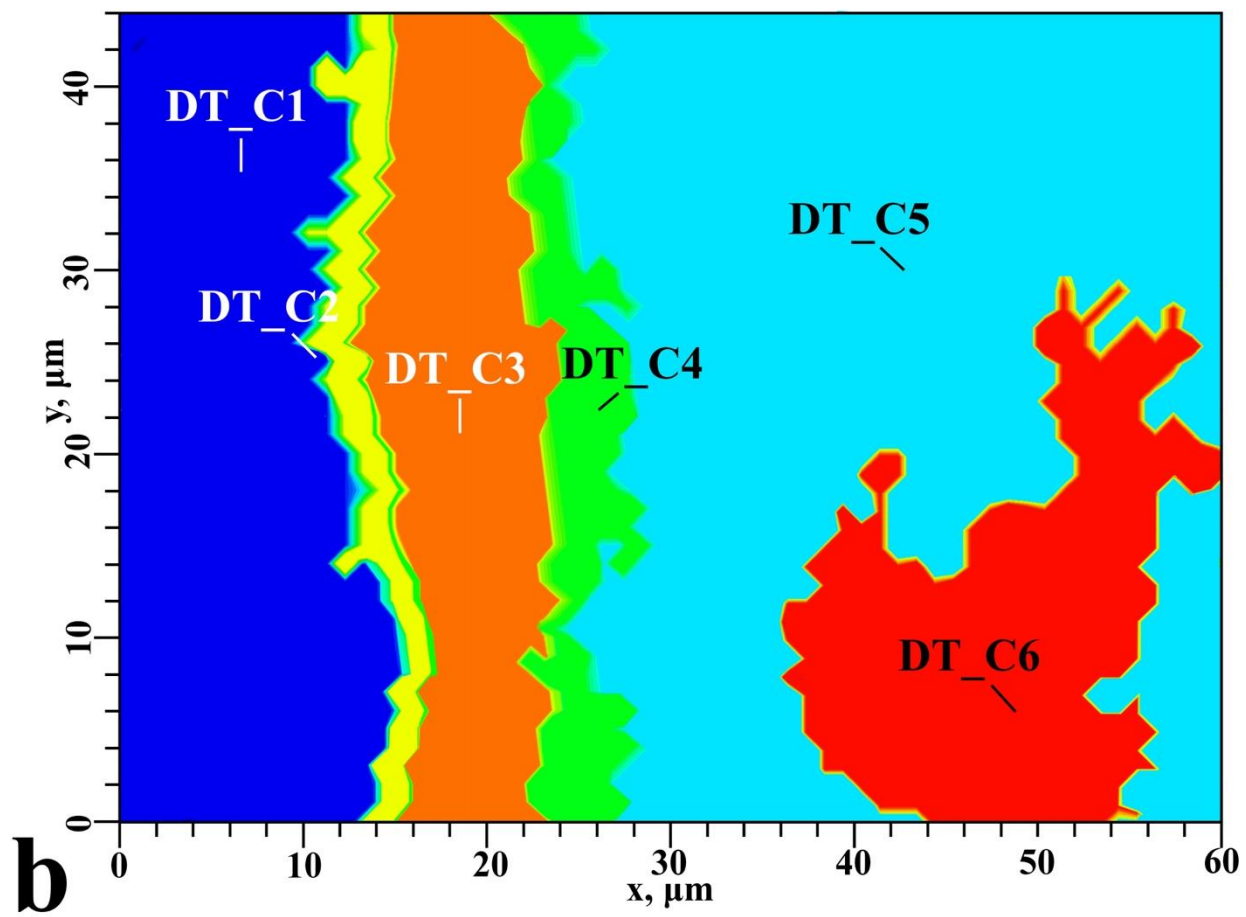



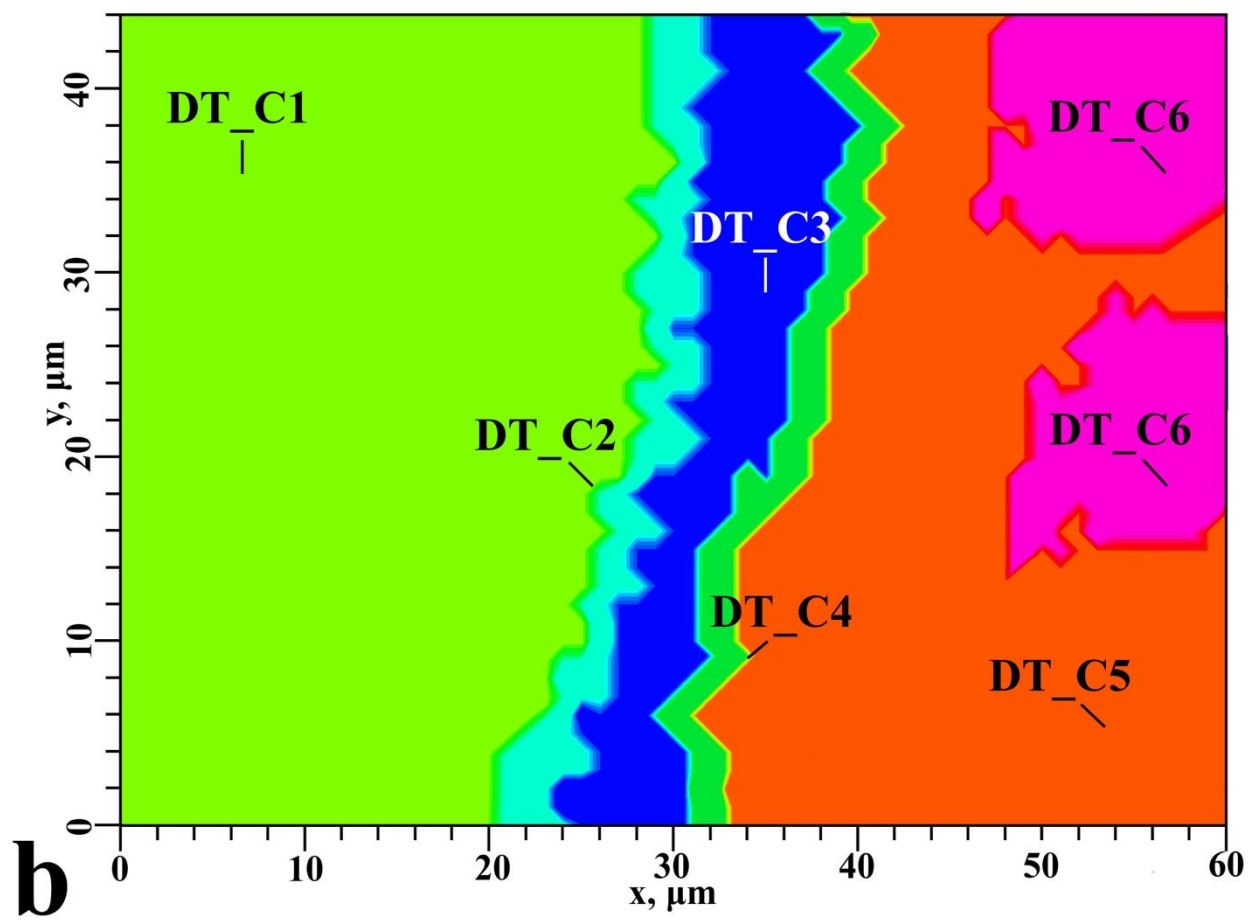

**The averaged spectra of clusters with the error deviation bar (standard deviation) from the interface region with cavity wall formation in the sample using Er:YAG pulsed laser**

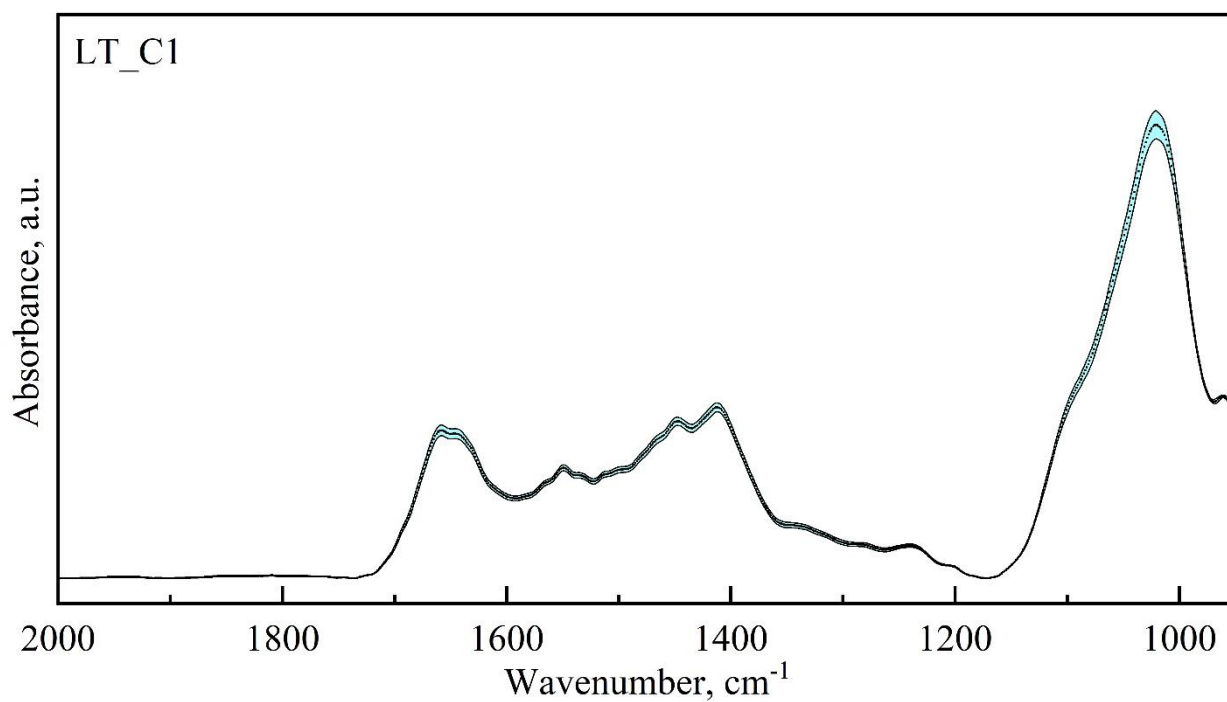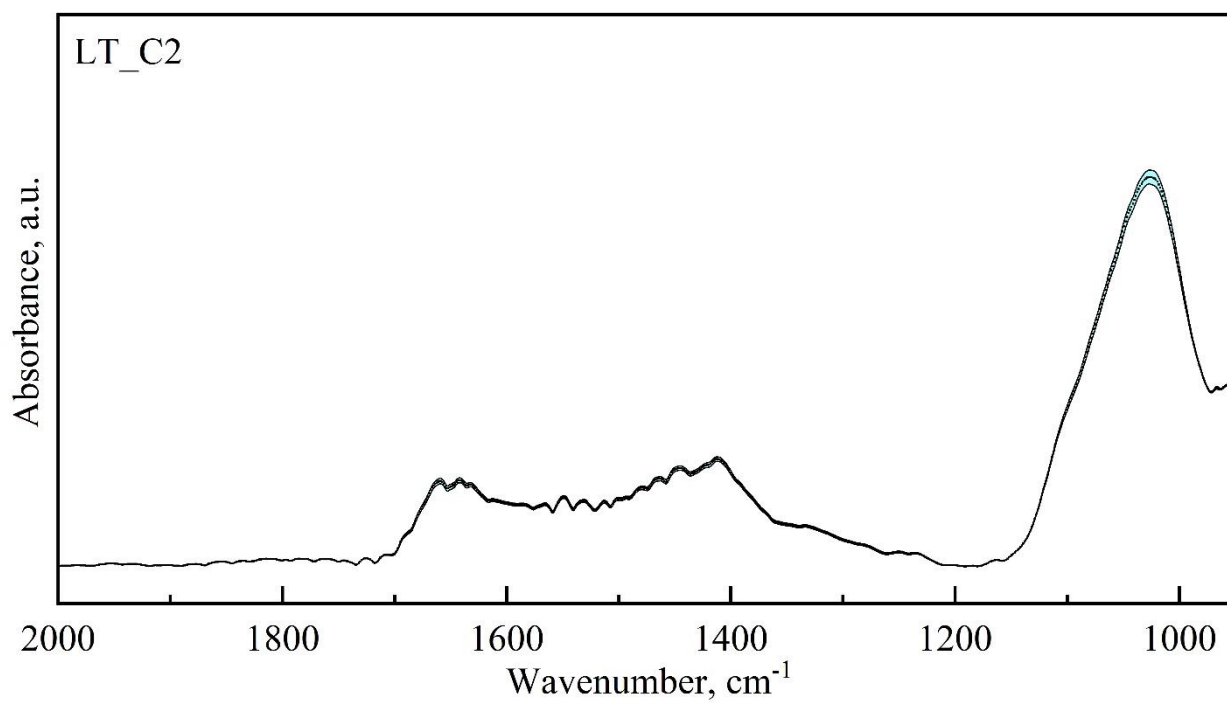

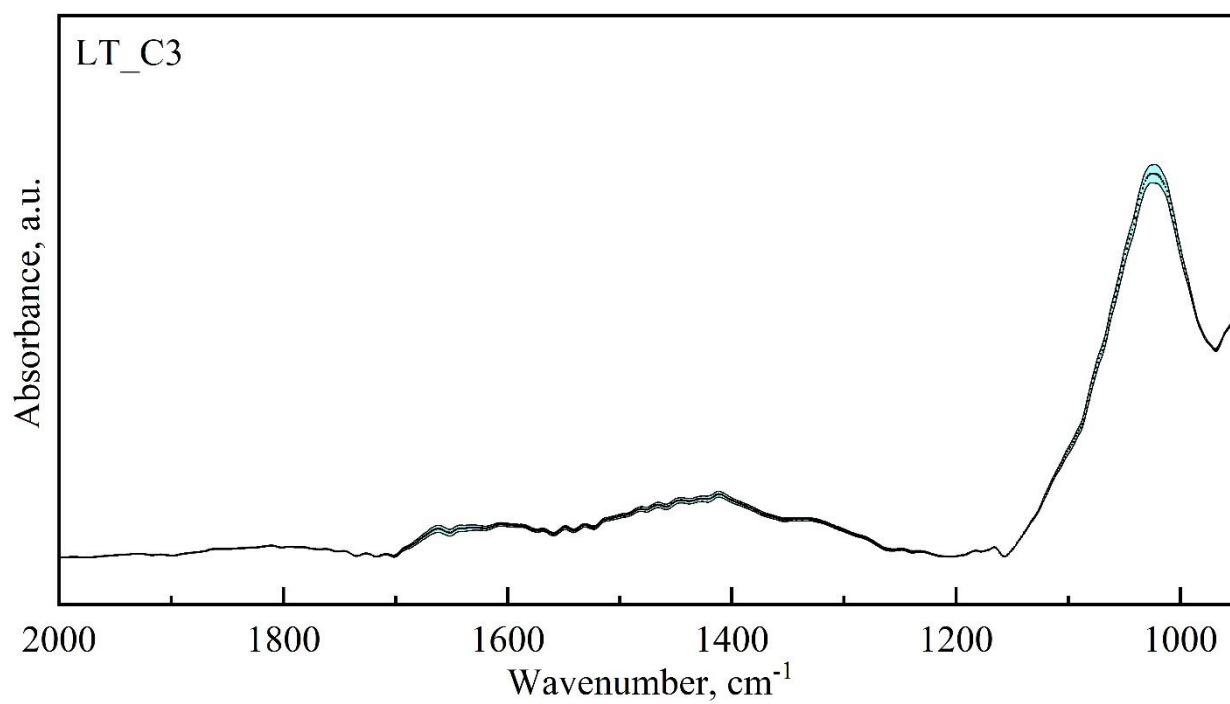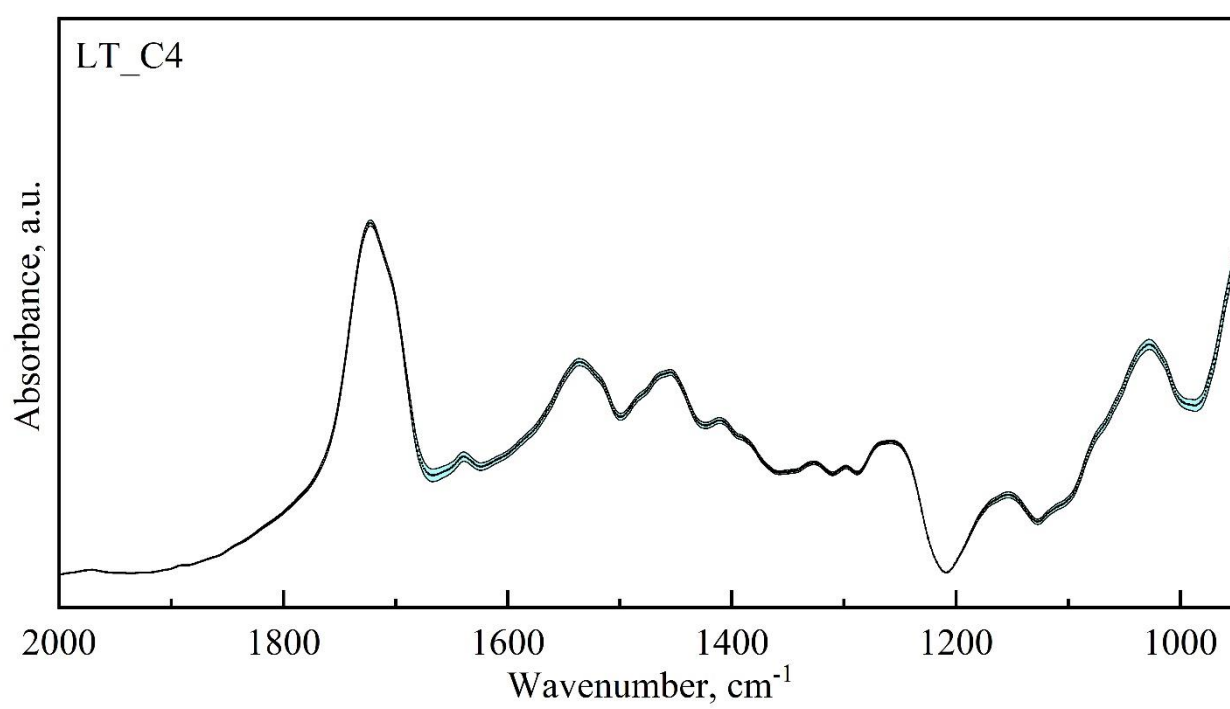

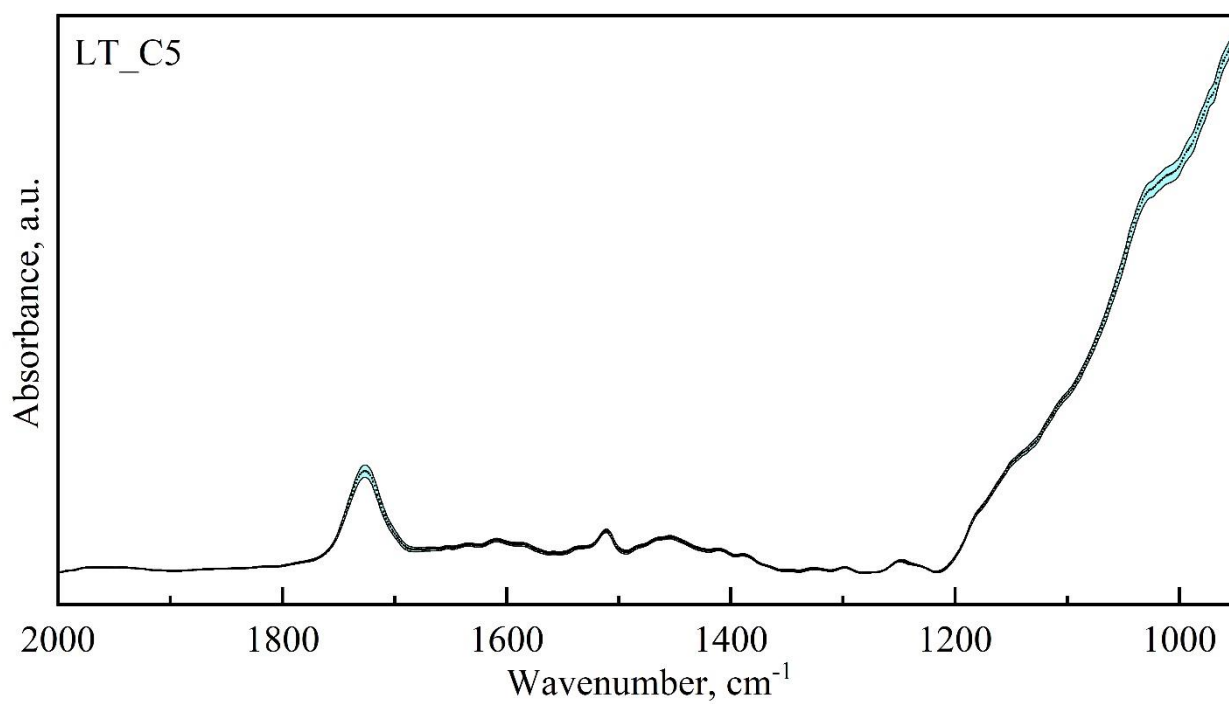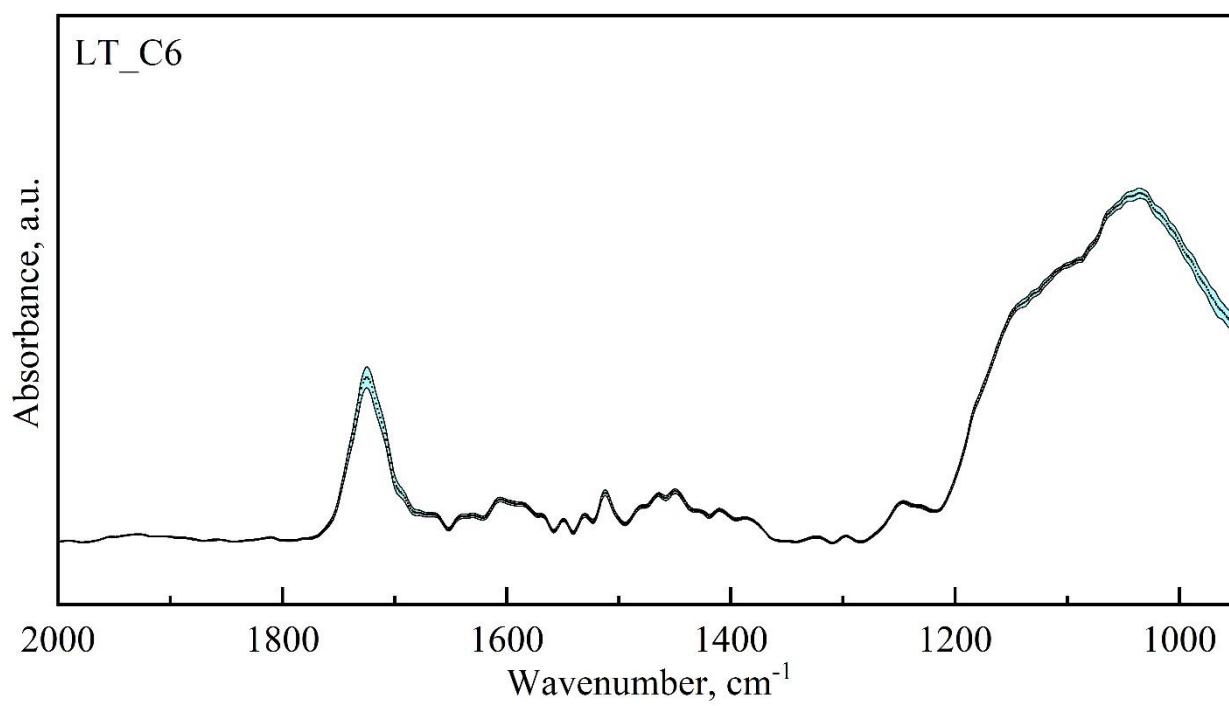



**The averaged spectra of clusters with the error deviation bar (standard deviation) from the interface region with cavity wall formation in the sample using diamond cylindrical drill with a turbine handpiece.**

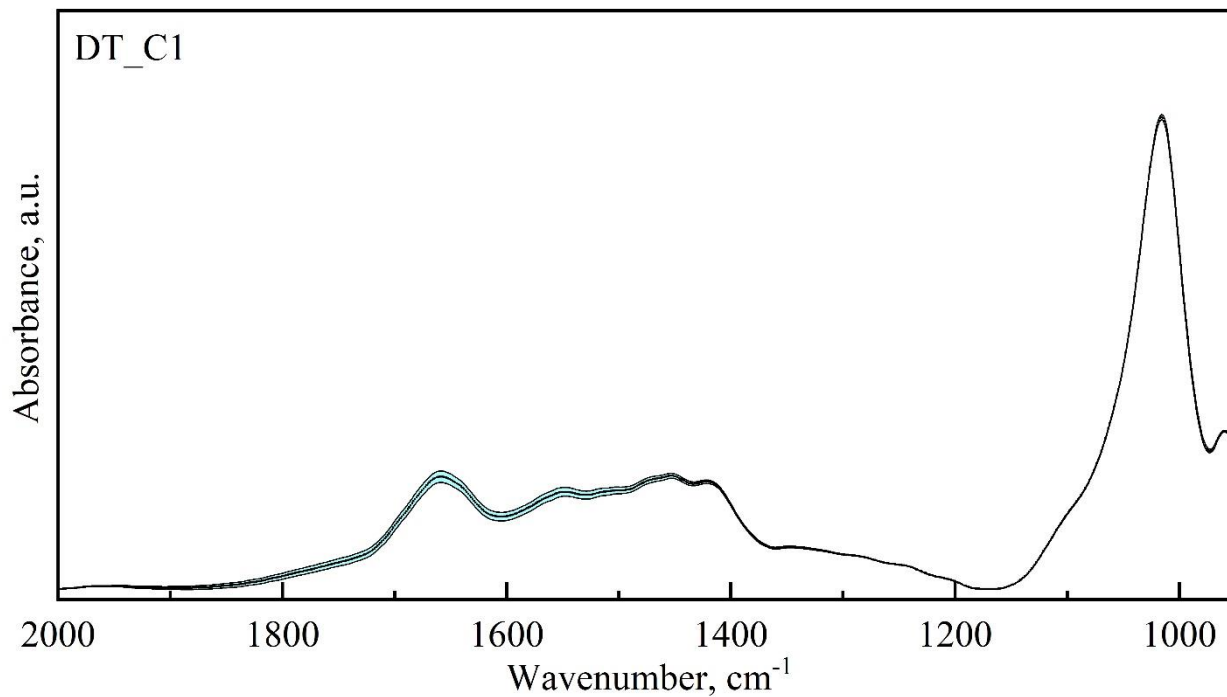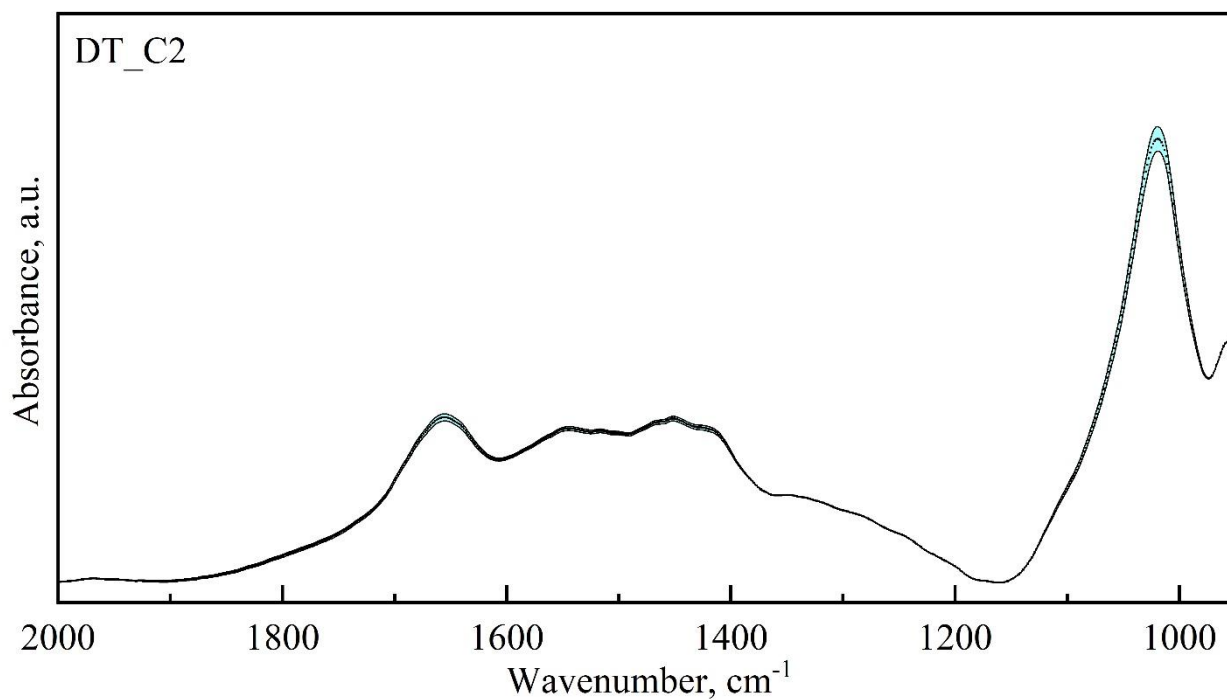

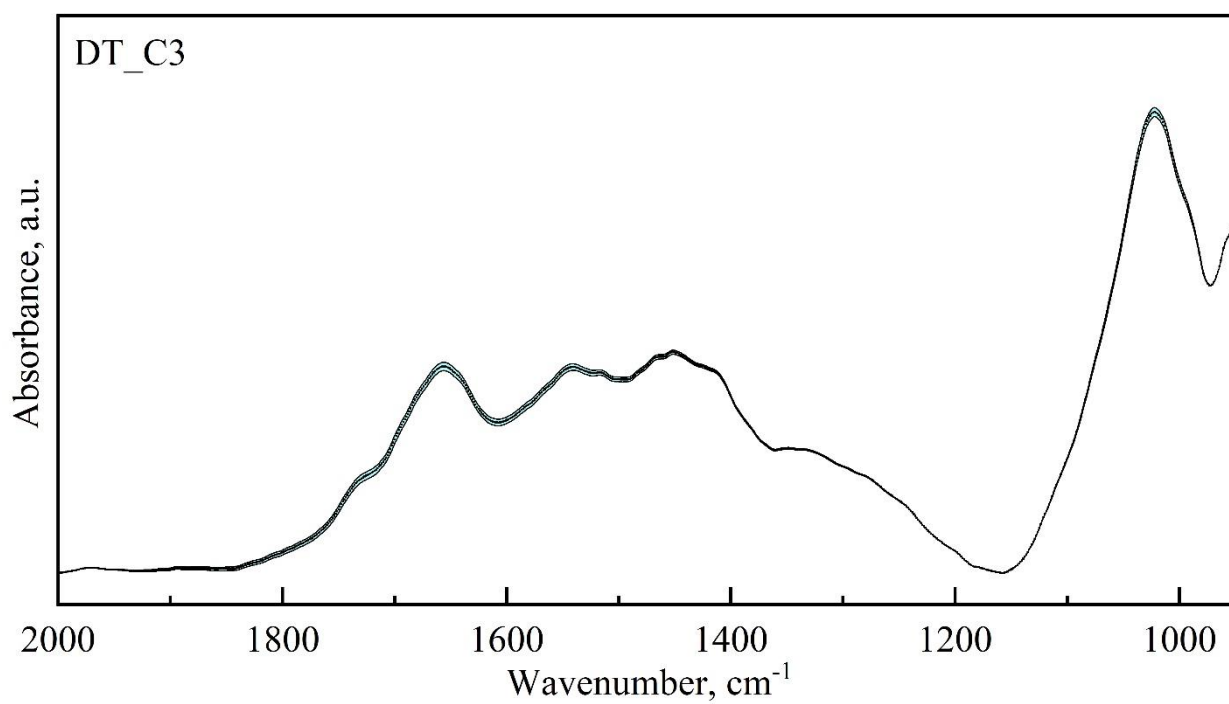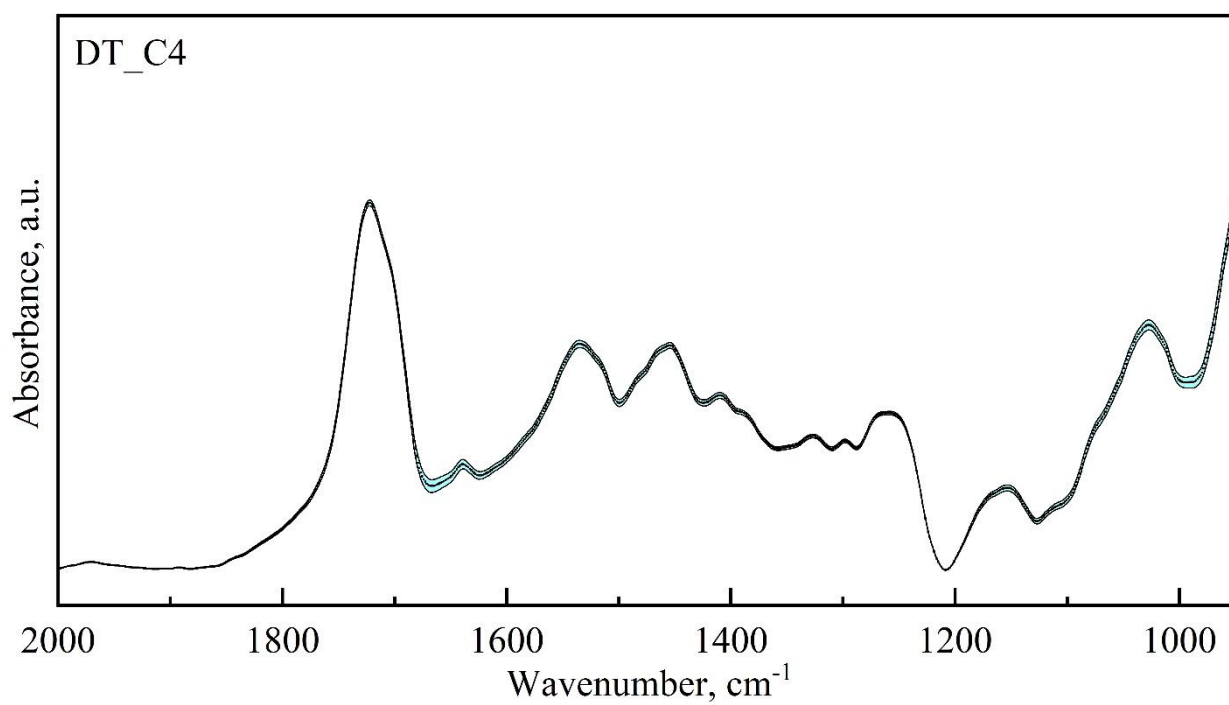

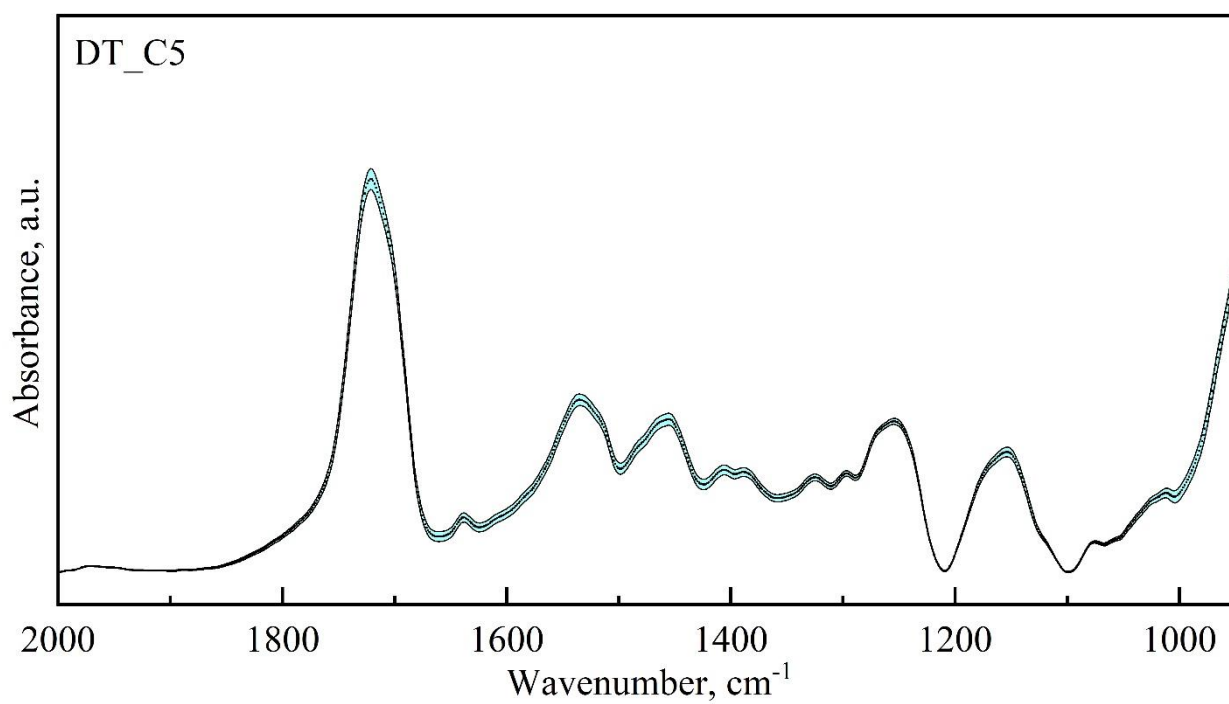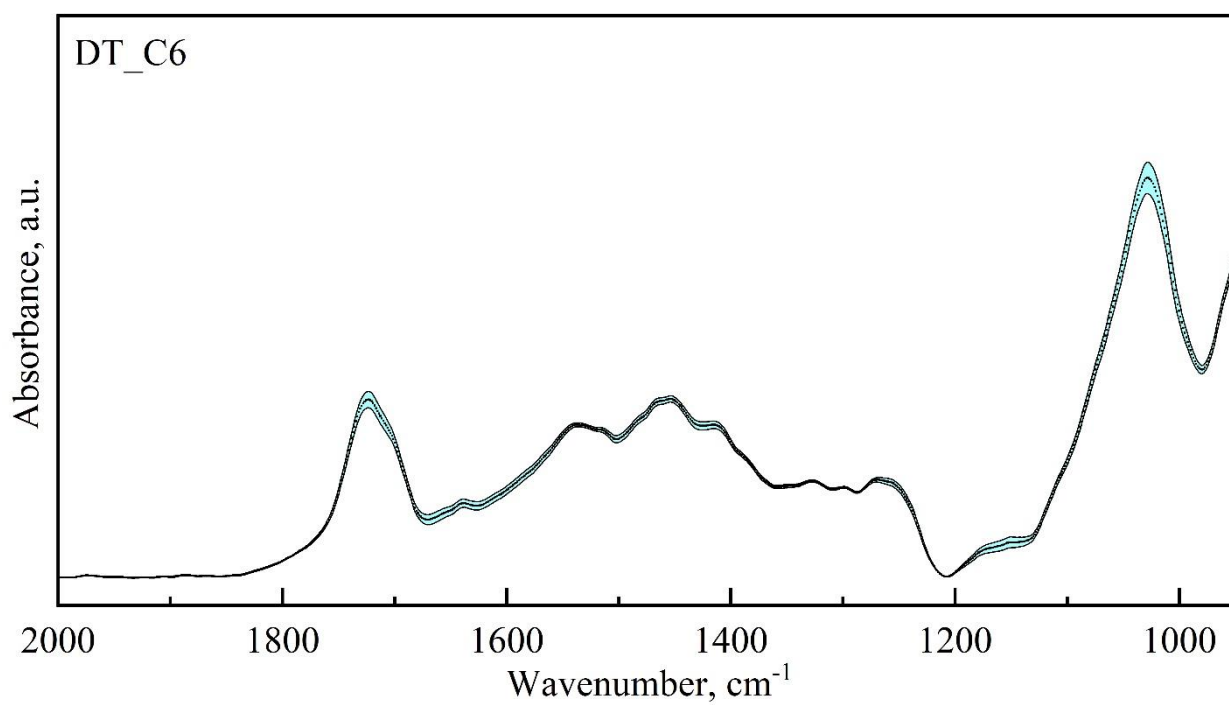

Supplement: s1 [file s1]
